# Supplementary material for: Nbs1 ChIP-Seq Identifies Off-Target DNA Double-Strand Breaks Induced by AID in Activated Splenic B Cells
Source: PubMed Central journal article supplement (PMC4532491; doi:10.1371/journal.pgen.1005438), 2015-08-11

**A**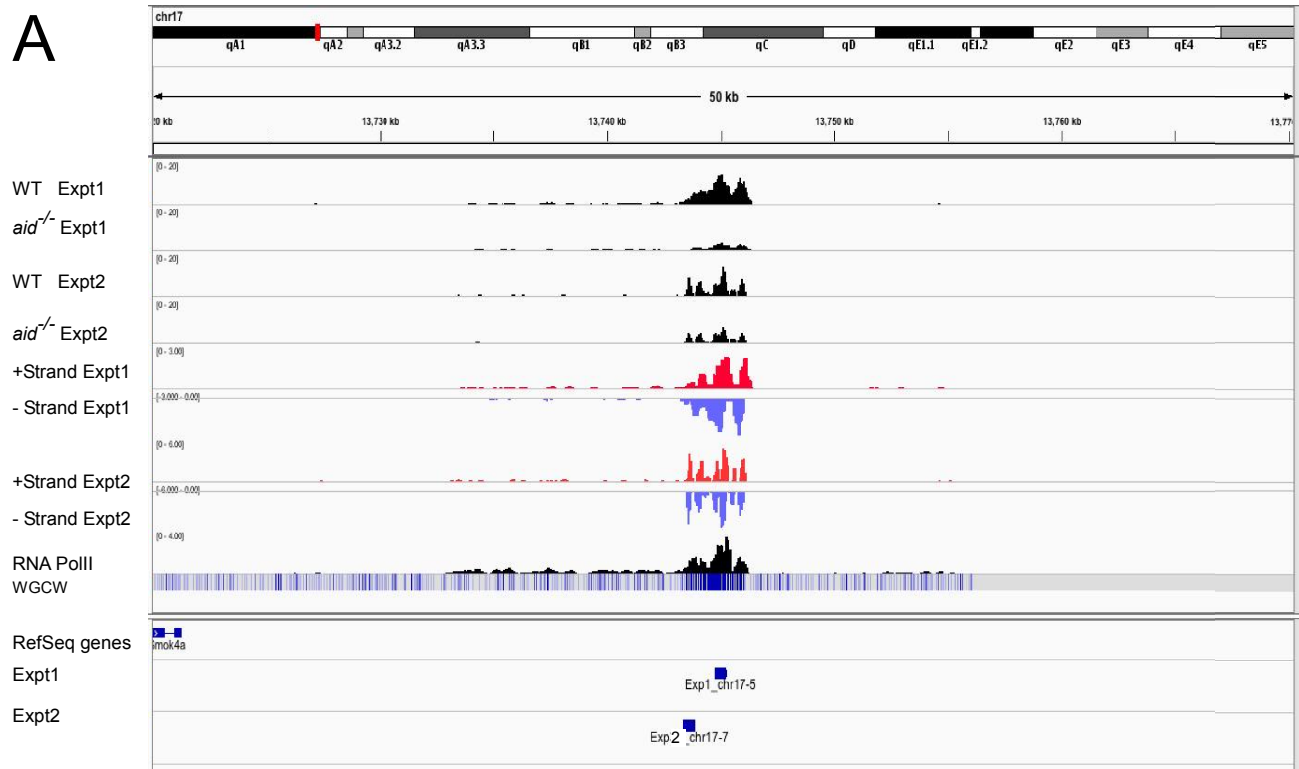**B**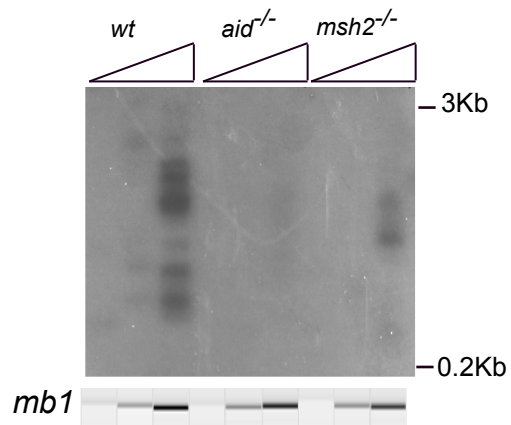

Supplement: pgen.1005438.s008.pdf [file pgen.1005438.s008.pdf]
